# Supplementary material
Source: MDPI journal article supplement (https://www.mdpi.com/2071-1050/12/3/909)
Supplement: s1 [file s1]

| QUESTIONNAIRE FOR ASSESSING THE SATISFACTION OF EMPLOYEES                                                                                                                               |                                           |
|-----------------------------------------------------------------------------------------------------------------------------------------------------------------------------------------|-------------------------------------------|
| Dear Colleague,                                                                                                                                                                         |                                           |
| In order to continuously improve the working environment and conditions, we are interested in your opinion regarding the degree of professional satisfaction you feel at the workplace. |                                           |
| Read carefully the sentences below and answer, marking for each statement in the empty cell, the answer that highlights your opinion about the professional activity.                   |                                           |
| Please submit this questionnaire in the box specially arranged on the section where you are working.                                                                                    |                                           |
| You do not have to sign this questionnaire; it is anonymous and confidential.                                                                                                           |                                           |
| Your answers are important to us!                                                                                                                                                       |                                           |
| 1. What is your PROFESSION? a. Doctors b. Nurses c. Auxiliary staff d. TESA staff                                                                                                       |                                           |
| 2. Gender:                                                                                                                                                                              | a. feminine      b. masculine             |
| 3. Studies:                                                                                                                                                                             | a. higher      b. average      c. general |
| 4. For a better performance of the activity in optimal conditions, do you consider that improvements can be made to your hospital?                                                      |                                           |
|                                                                                                                                                                                         | a. Yes, improvements can be made          |
|                                                                                                                                                                                         | b. No, they are not necessary             |
|                                                                                                                                                                                         | c. I do not know                          |
| <p>If your answer was " YES " to the previous question, please mention 3 improvements that come in support of a better activity.</p> <p>.....</p> <p>.....</p> <p>.....</p>             |                                           |
| 5 Are you satisfied with working in this hospital??                                                                                                                                     |                                           |
|                                                                                                                                                                                         | a. Yes      b. No      c. I do not know   |
| 6. Are you motivated?                                                                                                                                                                   |                                           |
|                                                                                                                                                                                         | a. Yes      b. No      c. I do not know   |
| 7. Is there a communication and collaboration relationship between you and the hierarchical superiors?                                                                                  |                                           |
|                                                                                                                                                                                         | a. Yes      b. No      c. Sometimes       |
| 8. Do you consider that there is an efficient communication relationship between the hospital management and you?                                                                       |                                           |
|                                                                                                                                                                                         | a. Yes      b. No      c. Sometimes       |
| 9. Between you as an employee of the hospital and colleagues there are relations of:                                                                                                    |                                           |
|                                                                                                                                                                                         | a. Friendship                             |
|                                                                                                                                                                                         | b. Collegiality                           |
|                                                                                                                                                                                         | c. Other                                  |
|                                                                                                                                                                                         | d. No relationship                        |
| 10. As an employee, do you know what your superiors expect in terms of your work?                                                                                                       |                                           |
|                                                                                                                                                                                         | a. Yes      b. No      c. Sometimes       |
| 11. Do you consider that at the hospital level there is a policy to promote its employees?                                                                                              |                                           |
|                                                                                                                                                                                         | a. Yes      b. No      c. Sometimes       |
| 12. What do you think about your professional development within the Hospital?                                                                                                          |                                           |
|                                                                                                                                                                                         | a. Less than satisfactory                 |
|                                                                                                                                                                                         | b. Satisfactory                           |
|                                                                                                                                                                                         | c. Like most institutions                 |

|                                                                                                                                                  |                                                                         |
|--------------------------------------------------------------------------------------------------------------------------------------------------|-------------------------------------------------------------------------|
|                                                                                                                                                  | d. Very advantageous                                                    |
| 13. Regarding your activity:                                                                                                                     |                                                                         |
|                                                                                                                                                  | a. I know my role                                                       |
|                                                                                                                                                  | b. I do just the things I was trained for                               |
|                                                                                                                                                  | c. I use all my knowledge to better perform my work                     |
|                                                                                                                                                  | d. I only use a part of the knowledge I have acquired                   |
|                                                                                                                                                  | e. I cannot use my acquired knowledge                                   |
| 14. Do you feel safe in terms of material supply, sanitary equipment, technical equipment necessary to carry out your activity? You are pleased? |                                                                         |
|                                                                                                                                                  | a. I'm worried about security                                           |
|                                                                                                                                                  | b. Security needs to be improved                                        |
|                                                                                                                                                  | c. I feel safe                                                          |
|                                                                                                                                                  | d. I have no worries                                                    |
| 15. The layout and cleanliness of the common areas (changing room, toilet, shower etc.) are considered:                                          |                                                                         |
|                                                                                                                                                  | a. Unsatisfying                                                         |
|                                                                                                                                                  | b. Satisfying                                                           |
|                                                                                                                                                  | c. Good                                                                 |
|                                                                                                                                                  | d. Very good                                                            |
| 16. The layout of the workplace, you consider:                                                                                                   |                                                                         |
|                                                                                                                                                  | a. Unsatisfying                                                         |
|                                                                                                                                                  | b. Satisfying                                                           |
|                                                                                                                                                  | c. Good                                                                 |
|                                                                                                                                                  | d. Very good                                                            |
| 17. To what extent are you satisfied with the quality and usefulness of the training and professional development courses you attended?          |                                                                         |
|                                                                                                                                                  | a. I did not participate                                                |
|                                                                                                                                                  | b. Unsatisfying                                                         |
|                                                                                                                                                  | c. Good                                                                 |
|                                                                                                                                                  | d. Very good                                                            |
| 18. You appreciate the degree of attractiveness of the work performed as:                                                                        |                                                                         |
|                                                                                                                                                  | a. Very low                                                             |
|                                                                                                                                                  | b. Low                                                                  |
|                                                                                                                                                  | c. Moderate                                                             |
|                                                                                                                                                  | d. High                                                                 |
|                                                                                                                                                  | e. Very high                                                            |
| 19. You appreciate the degree of exploiting your skills and abilities as:                                                                        |                                                                         |
|                                                                                                                                                  | a. Very low                                                             |
|                                                                                                                                                  | b. Low                                                                  |
|                                                                                                                                                  | c. Moderate                                                             |
|                                                                                                                                                  | d. High                                                                 |
|                                                                                                                                                  | e. Very high                                                            |
| 20. Do you think you are well enough informed about the risks of the job?                                                                        |                                                                         |
|                                                                                                                                                  | a. Yes                      b. No                      c. I do not know |
| 21. What is the quality of the protective measures taken and the provision with individual equipment?                                            |                                                                         |
|                                                                                                                                                  | a. Unsatisfying                                                         |

|                                                                                                           |                                |
|-----------------------------------------------------------------------------------------------------------|--------------------------------|
|                                                                                                           | b. Satisfying                  |
|                                                                                                           | c. I am satisfied              |
|                                                                                                           | d. I am very satisfied         |
| 22. Do you think your superior listens to you and analyzes your ideas / proposals for improvement?        |                                |
|                                                                                                           | a. No                          |
|                                                                                                           | b. Sometimes                   |
|                                                                                                           | c. He approves of me           |
|                                                                                                           | d. He listens to me            |
|                                                                                                           | e. He appreciates my opinions. |
| 23. How do you appreciate the quality of the linen, the cleanliness and the protective equipment granted? |                                |
|                                                                                                           | a. Unsatisfying                |
|                                                                                                           | b. Satisfying                  |
|                                                                                                           | c. I am satisfied              |
|                                                                                                           | d. I am very satisfied         |
| 24. What is your opinion about this questionnaire?                                                        |                                |
|                                                                                                           | a. I don't have a good opinion |
|                                                                                                           | b. Good                        |
|                                                                                                           | c. Very good                   |
| 25. <b>OBSERVATIONS OR SUGGESTIONS to improve the quality of the medical act</b>                          |                                |
| .....                                                                                                     |                                |
| .....                                                                                                     |                                |
| <b>Thank you for collaboration!</b>                                                                       |                                |
